# Supplementary material
Source: Springer Nature journal article supplement (https://www.springermedizin.de/resource/supplementary/12885_2011_2791_MOESM5_ESM.pdf/9462002)

**A**

IP: PDGFR- $\beta$   
Blot: PDGFR- $\beta$

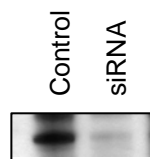**B**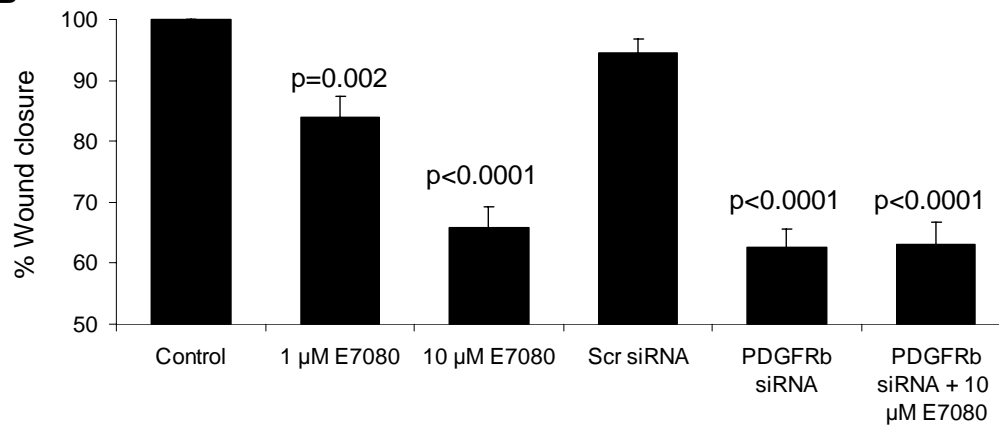**C**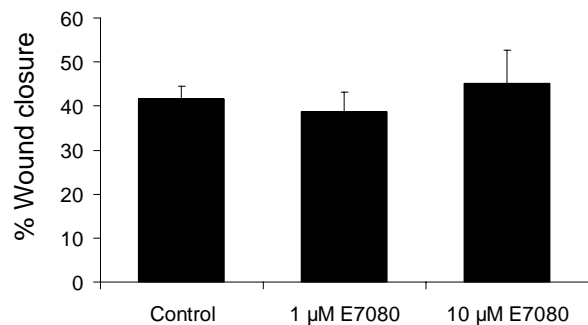

Supplement: MOESM5 [file 9462002]
